# Supplementary material for: Chromatographic fingerprinting of epiphytic fungal strains isolated from Withania somnifera and biological evaluation of isolated okaramine H
Source: Royal Society of Chemistry journal article supplement (doi:10.1039/d4ay00901k), 2024-01-01
Supplement: d4ay00901k1.pdf [file d4ay00901k1.pdf]

Electronic Supplementary Information

**Chromatographic fingerprinting of epiphytic fungal strains isolated from *Withania somnifera* and biological evaluation of Okaramine H**

Vandana Sharma<sup>a,e</sup>, Shifali Chib<sup>c,e</sup>, Diksha Kumari<sup>d,e</sup>, Kuljit Singh<sup>d,e</sup>, Saurabh Saran<sup>c,e</sup>, Deepika Singh<sup>a,b,e,\*</sup>

<sup>a</sup> *Quality Control & Quality Assurance Division, CSIR-Indian Institute of Integrative Medicine Canal Road Jammu Tawi, 180001, India*

<sup>b</sup> *Quality Management & Instrumentation Division, CSIR-Indian Institute of Integrative Medicine Canal Road Jammu Tawi, 180001, India*

<sup>c</sup> *Fermentation and Microbial Biotechnology Division, CSIR-Indian Institute of Integrative Medicine Canal Road Jammu Tawi, 180001, India*

<sup>d</sup> *Infectious Diseases Division, CSIR-Indian Institute of Integrative Medicine Canal Road Jammu Tawi, 180001, India*

<sup>e</sup> *Academy of Scientific & Innovative Research (AcSIR), Ghaziabad, 201002, India*

Table of content

| S.No. | Content                                                                                                      | Page No. |
|-------|--------------------------------------------------------------------------------------------------------------|----------|
| 1     | Fig. S1 HPTLC Fingerprinting of different extracts (S17-S21)                                                 | 3        |
| 2     | Fig. S2 Chromatographic fingerprinting of S17 at 254nm                                                       | 3        |
| 3     | Fig. S3 (a) Observed mass $m/z$ of S17-HF-01                                                                 | 4        |
| 4     | Fig. S3 (b) Observed mass $m/z$ of S17-HF-02                                                                 | 4        |
| 5     | Fig. S3 (c) Observed mass $m/z$ of S17-HF-03                                                                 | 5        |
| 6     | Fig. S3 (d) Observed mass $m/z$ of S17-HF-04                                                                 | 5        |
| 7     | Fig. S3 (e) Observed mass $m/z$ of S17-HF-05                                                                 | 6        |
| 8     | Fig. S4 (a) UV spectra of S17 at $t_R=22.972$                                                                | 6        |
| 9     | Fig. S4 (b) UV spectra of S17 at $t_R=30.644$                                                                | 6        |
| 10    | Fig. S4 (c) UV spectra of S17 at $t_R=32.439$                                                                | 7        |
| 11    | Fig. S4 (d) UV spectra of S17 at $t_R=34.110$                                                                | 7        |
| 12    | Fig. S4 (e) UV spectra of S17 at $t_R=41.018$                                                                | 7        |
| 13    | Fig. S5 Chromatographic fingerprinting of S18 at 254nm                                                       | 7        |
| 14    | Fig. S6 (a) Observed mass $m/z$ of S18-HF-01                                                                 | 8        |
| 15    | Fig. S6 (b) Observed mass $m/z$ of S18-HF-02                                                                 | 8        |
| 16    | Fig. S6 (c) Observed mass $m/z$ of S18-HF-03                                                                 | 9        |
| 17    | Fig. S7 (a) UV spectra of S18 at $t_R=6.054$                                                                 | 9        |
| 18    | Fig. S7 (b) UV spectra of S18 at $t_R=6.398$                                                                 | 9        |
| 19    | Fig. S7 (c) UV spectra of S18 at $t_R=6.825$                                                                 | 10       |
| 20    | Fig. S7 (d) UV spectra of S18 at $t_R=9.195$                                                                 | 10       |
| 21    | Fig. S7 (e) UV spectra of S18 at $t_R=37.500$                                                                | 11       |
| 22    | Fig. S8 Chromatographic fingerprinting of S19 at 254nm                                                       | 11       |
| 23    | Fig. S9 Chromatographic fingerprinting of S21 at 254nm                                                       | 11       |
| 24    | Fig. S10 (a) Observed mass $m/z$ of S21-HF-02                                                                | 12       |
| 25    | Fig. S10 (b) Observed mass $m/z$ of S21-HF-03                                                                | 12       |
| 26    | Fig. S10 (c) Observed mass $m/z$ of S21-HF-04                                                                | 12       |
| 27    | Fig. S11 Morphological and microscopic view of <i>Aspergillus aculeatus</i>                                  | 13       |
| 28    | Fig. S12 (a) HPTLC fingerprinting of S20 at <i>Aspergillus aculeatus</i>                                     | 14       |
| 29    | Fig. S12 (b) HPTLC densitogram of S20                                                                        | 14       |
| 30    | Fig. S13 Chromatographic fingerprinting of S20 at solid state                                                | 15       |
| 31    | Fig. S14 (a) $^1\text{H}$ NMR spectrum of S20 HF-04                                                          | 15       |
| 32    | Fig. S14 (b) Expanded $^1\text{H}$ NMR spectrum of S20 HF-04 (6.4-10.8) ppm                                  | 16       |
| 33    | Fig. S14 (c) Expanded $^1\text{H}$ NMR spectrum of S20 HF-04 (4.3-6.1) ppm                                   | 16       |
| 34    | Fig. S14 (d) Expanded $^1\text{H}$ NMR spectrum of S20 HF-04 (1.4-3.4) ppm                                   | 17       |
| 35    | Fig. S15 Calibration curve of Isolated fraction okaramine H                                                  | 18       |
| 36    | Fig. S16 Calibration curve of Isolated fraction (2 <i>E</i> ,4 <i>Z</i> )- <i>N</i> -Isobutyl-2,4 dienamide) | 18       |

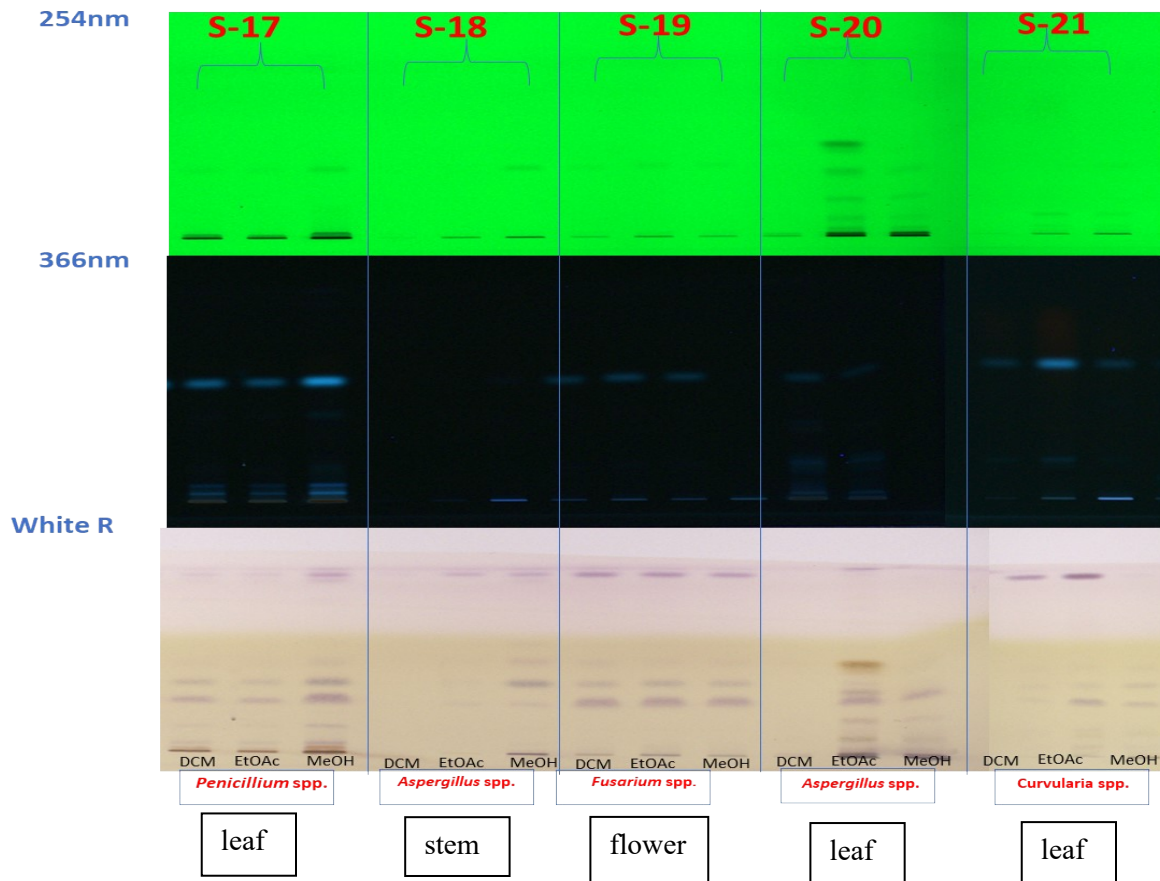

Fig. S1. HPTLC fingerprinting using HPTLC of all five epiphytic strains from S17-S21 in solvent system- ethyl acetate: hexane (4:6)

<Chromatogram>

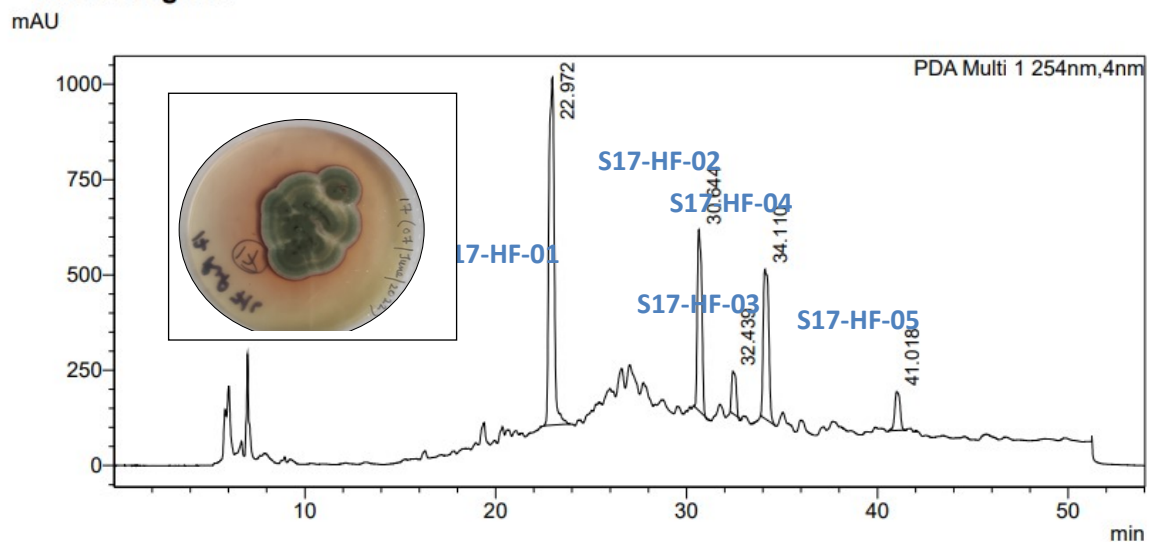

Fig. S2: Chromatographic fingerprinting of epiphytic strain *Penicillium* spp. S17 at 254nm

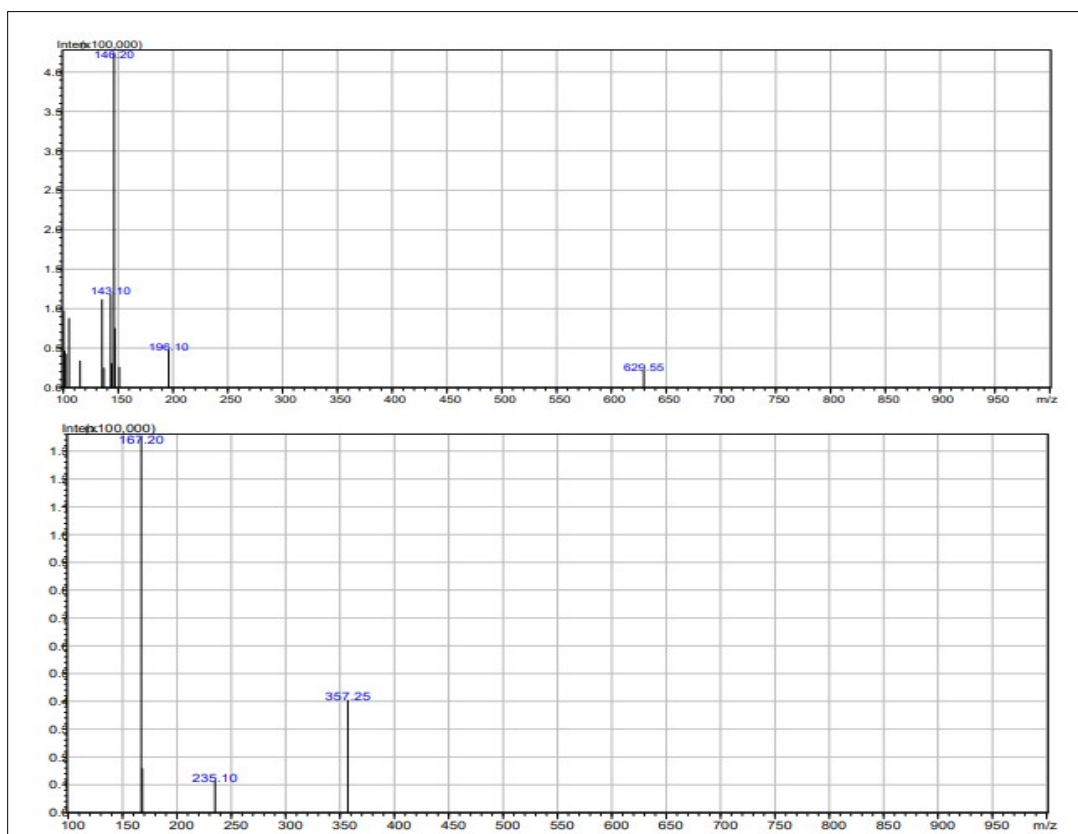

Fig. S3 (a). Observed mass  $m/z$  of S17-HF-01 fraction isolated at  $t_R$  of 2.972

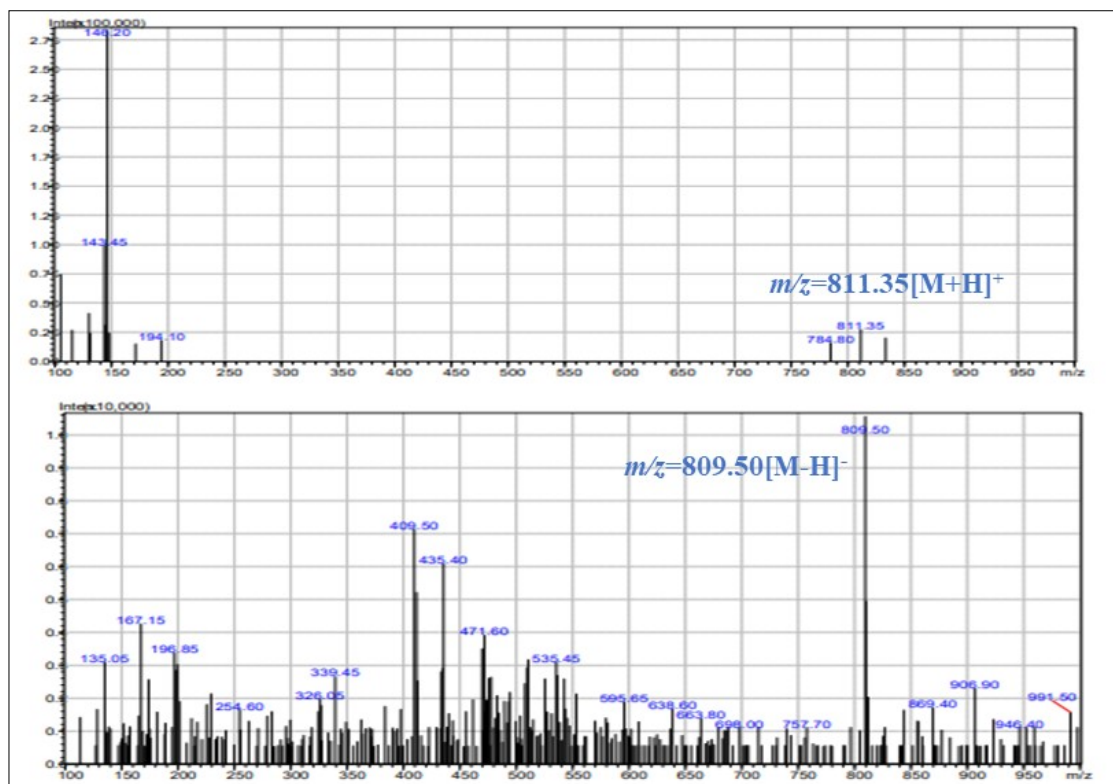

Fig. S3 (b). Observed mass  $m/z$  of S17-HF-02 fraction isolated at  $t_R$  of 30.644

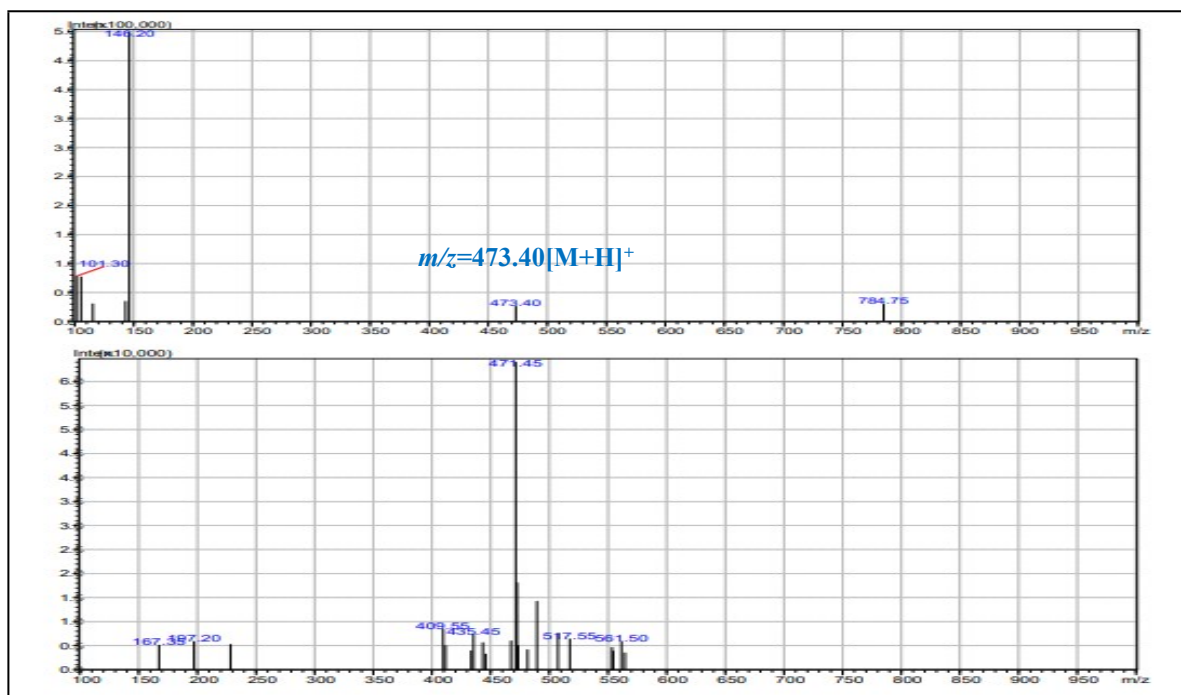

Fig. S3 (c). Observed mass  $m/z$  of S17-HF-03 fraction isolated at  $t_R$  of 32.439

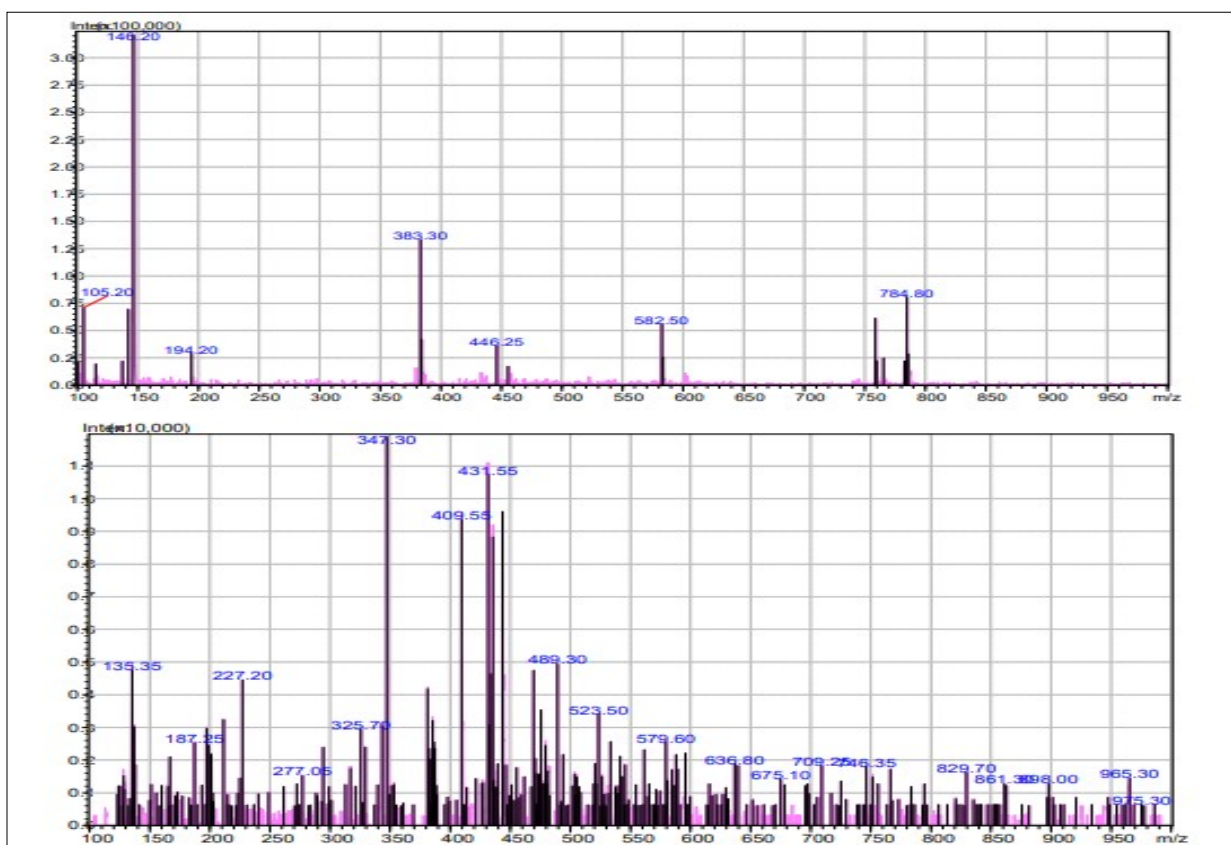

Fig. S3 (d). Observed mass  $m/z$  of S17-HF-04 fraction isolated at  $t_R$  of 34.110

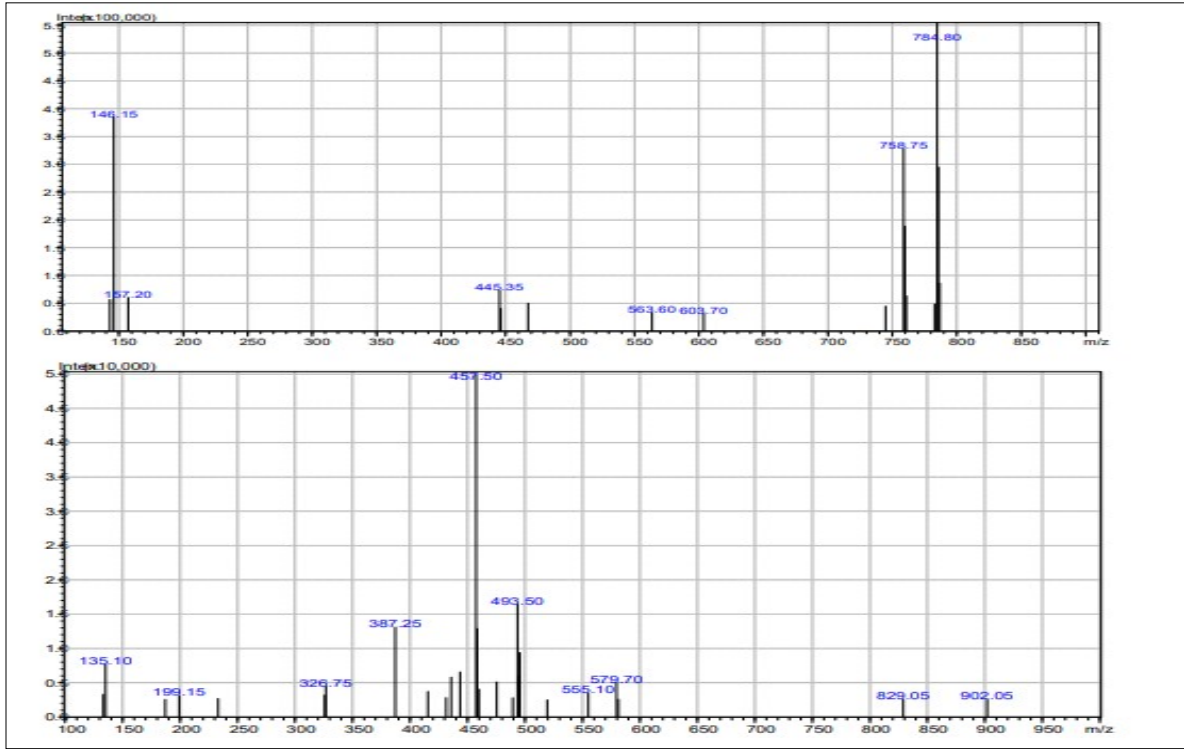

Fig. S3 (e). Observed mass  $m/z$  of S17-HF-05 fraction isolated at  $t_R$  of 41.018

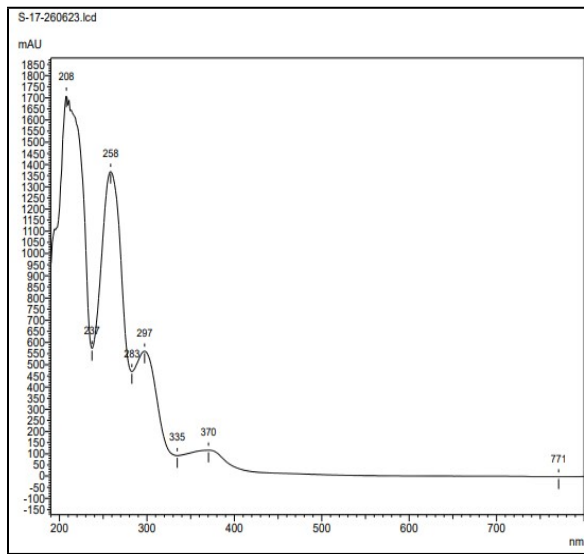

Fig. S4 (a) UV spectra of S17 at  $t_R = 22.972$

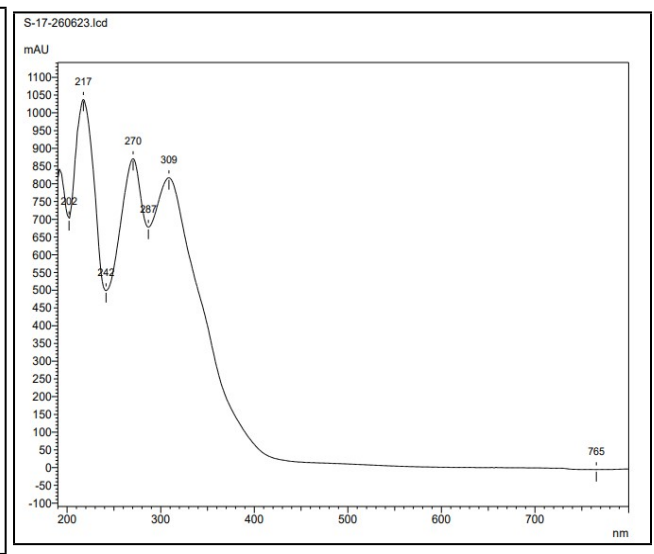

Fig. S4 (b) UV spectra of S17 at  $t_R = 30.644$

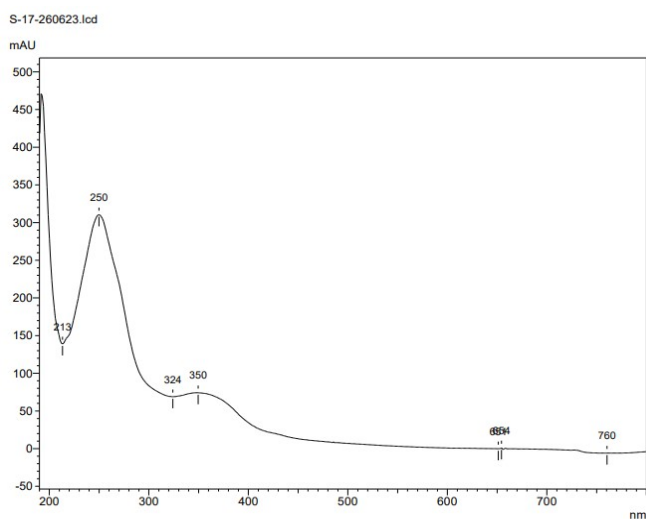

Fig. S4 (c) UV spectra of S17 at  $t_R=32.439$

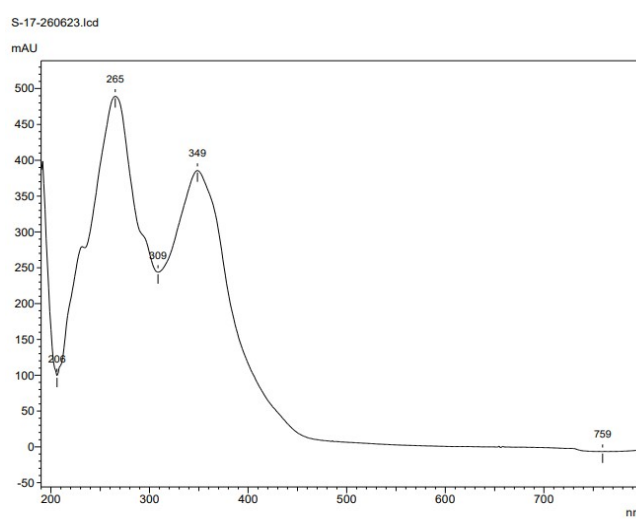

Fig. S4 (d) UV spectra of S17 at  $t_R=34.110$

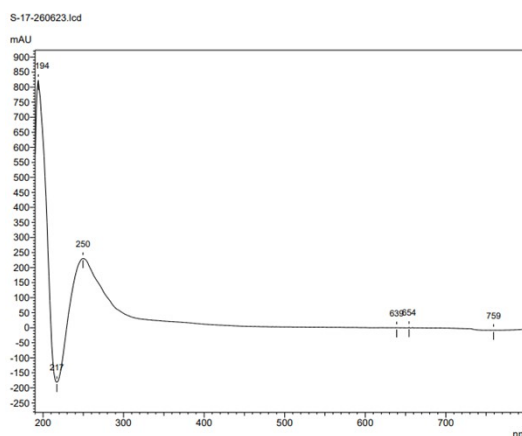

Fig. S4 (e) UV spectra of S17 at  $t_R=41.018$

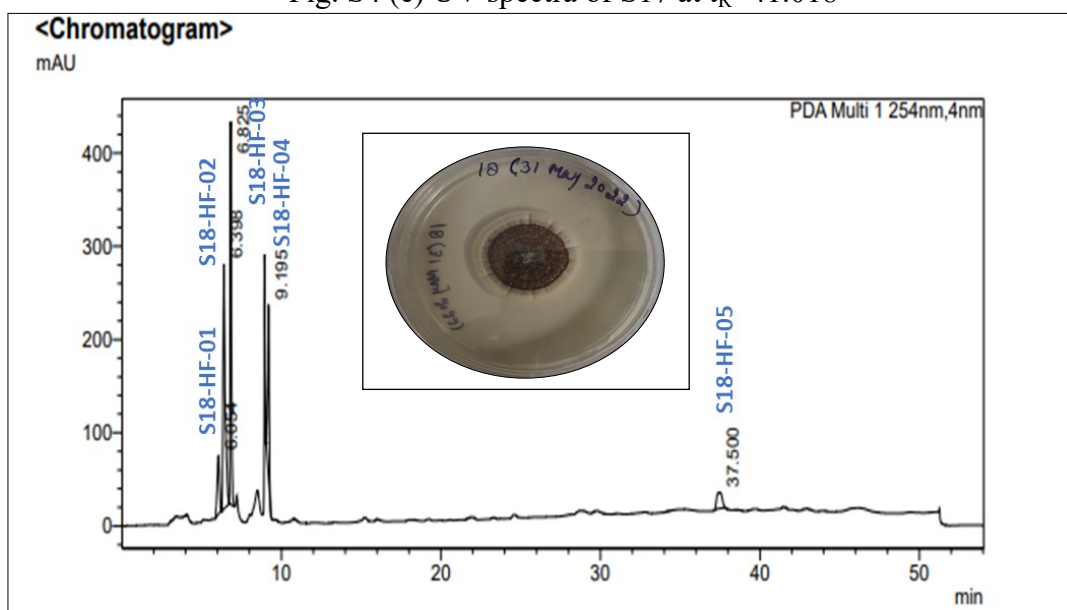

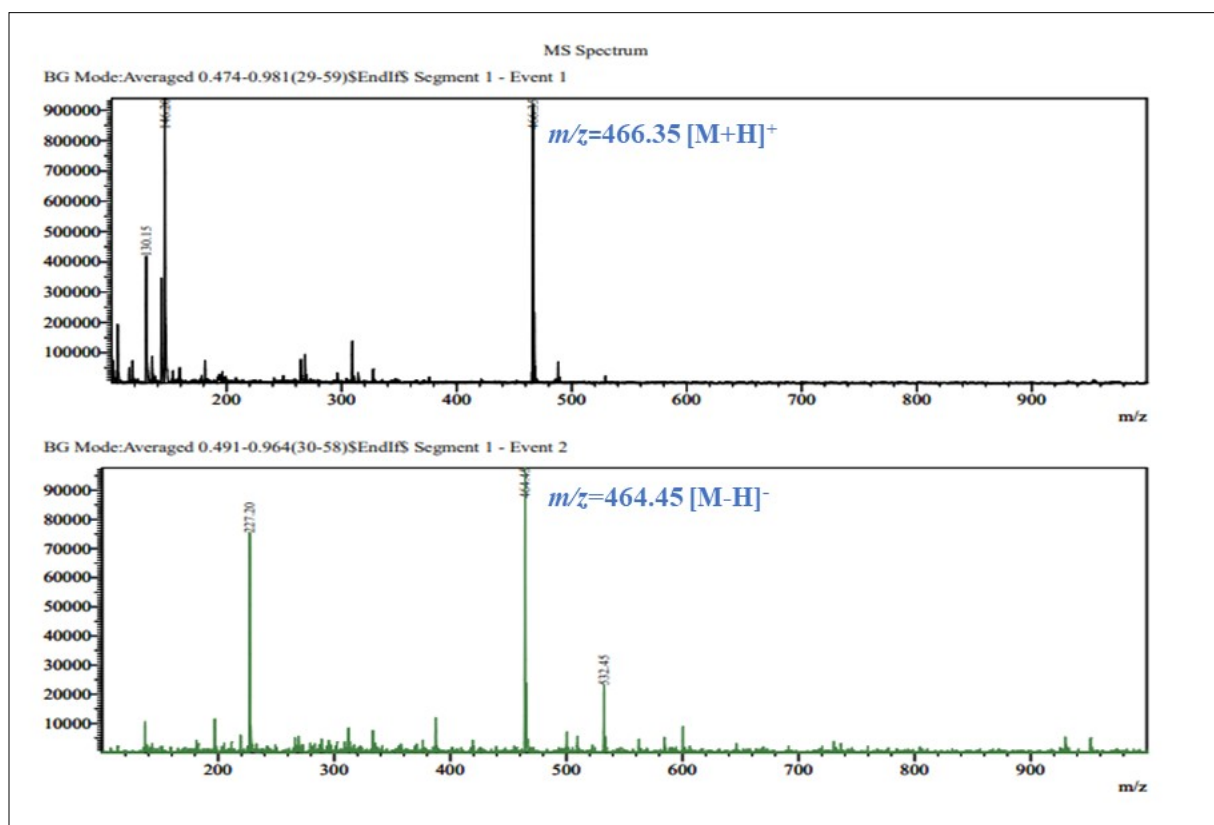

Fig. S5 Chromatographic fingerprinting of epiphytic strain *Aspergillus* spp. S18 at 254nm  
Fig. S6 (a): Observed mass  $m/z$  of S18-HF-01 fraction collected at  $t_R$  6.054

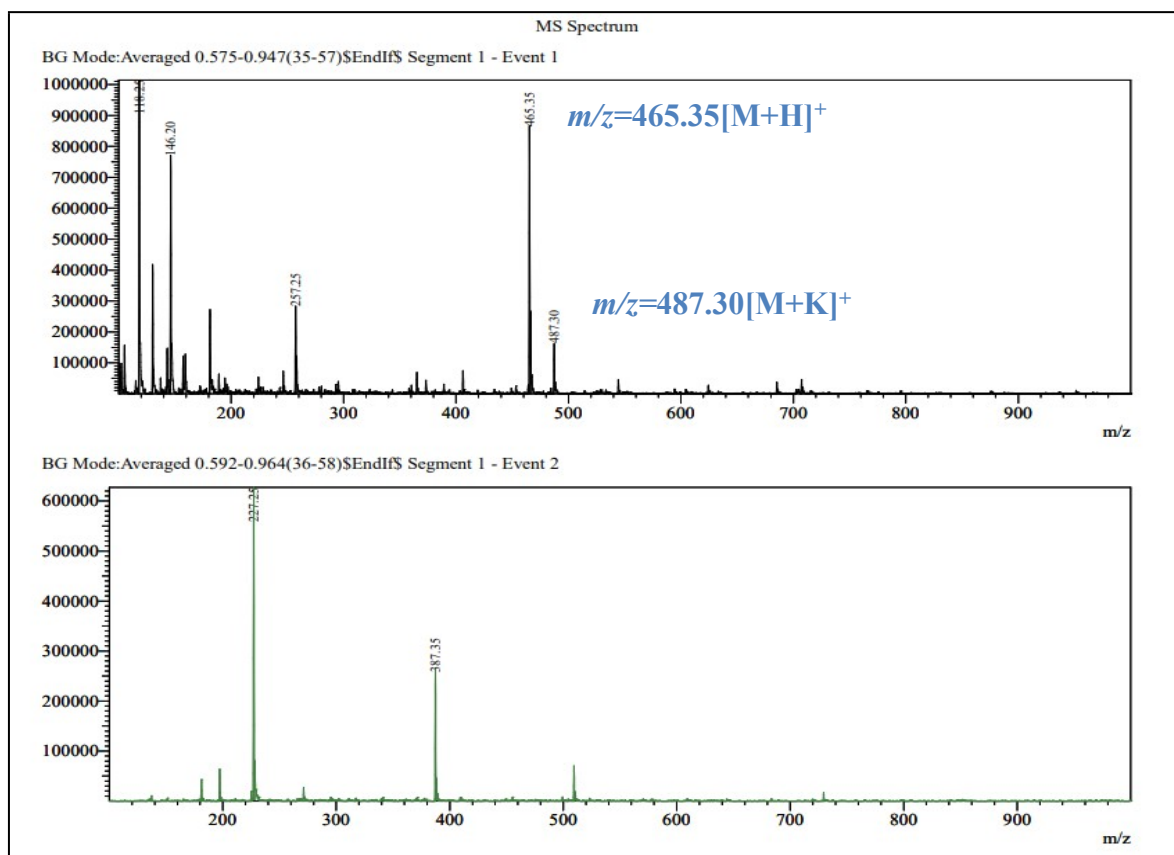

Fig. S6 (b): Observed mass  $m/z$  of S18-HF-02 fraction collected at  $t_R$  6.398



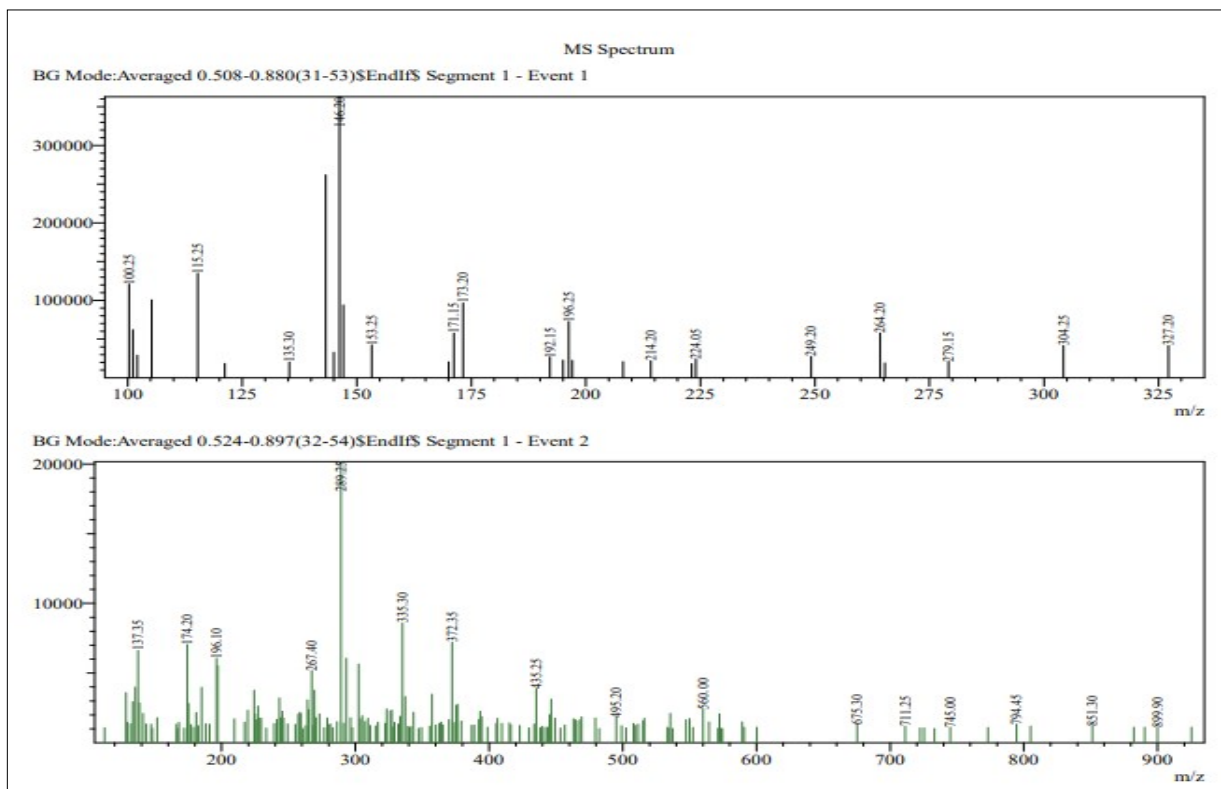

Fig. S6 (c): Observed mass  $m/z$  of S18-HF-03 fraction collected at  $t_R$  6.825

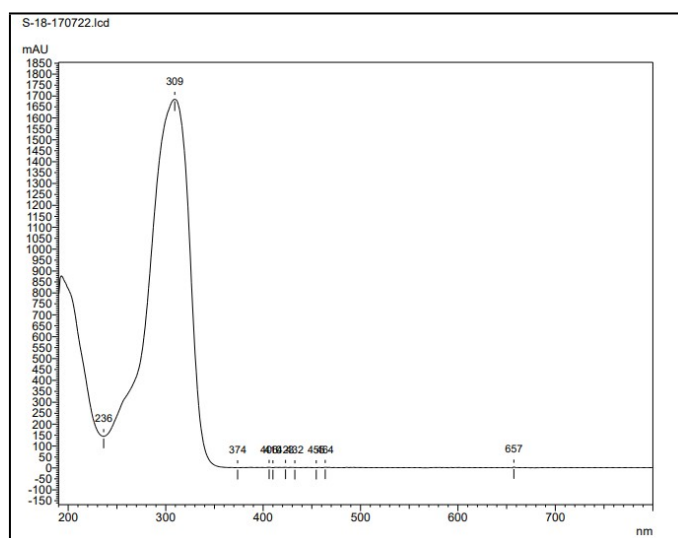

Fig. S7 (a) UV spectra of S18 at  $t_R$ =6.054

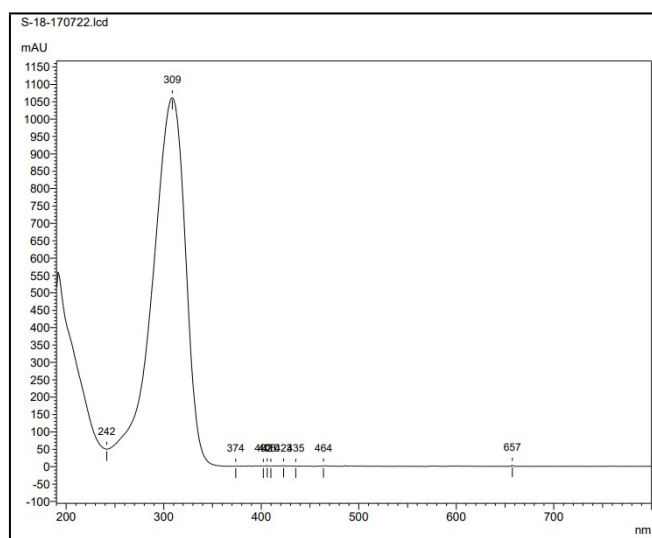

Fig. S7 (b) UV spectra of S18 at  $t_R$ =6.398

S-18-170722.lcd

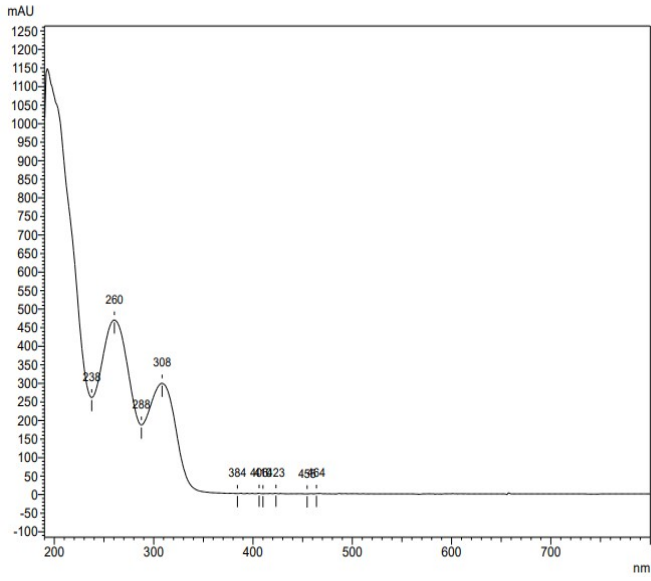

Fig. S7 (c) UV spectra of S18 at  $t_R=6.825$

S-18-170722.lcd

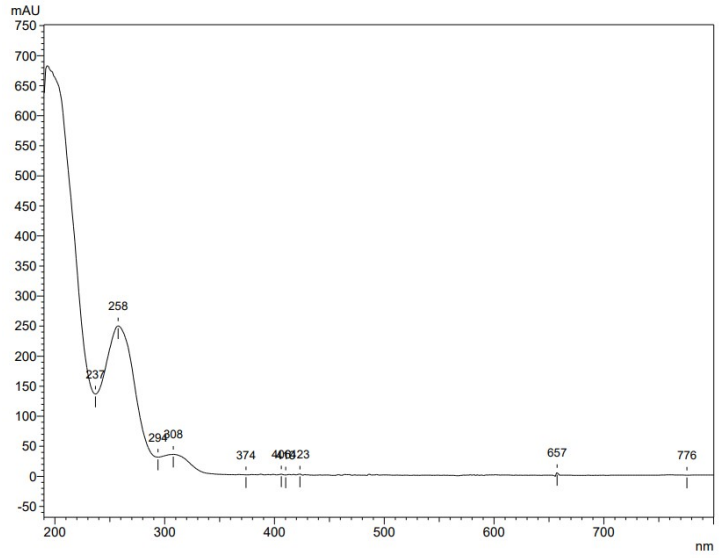

Fig. S7 (d) UV spectra of S18 at  $t_R=9.195$

S-18-170722.lcd

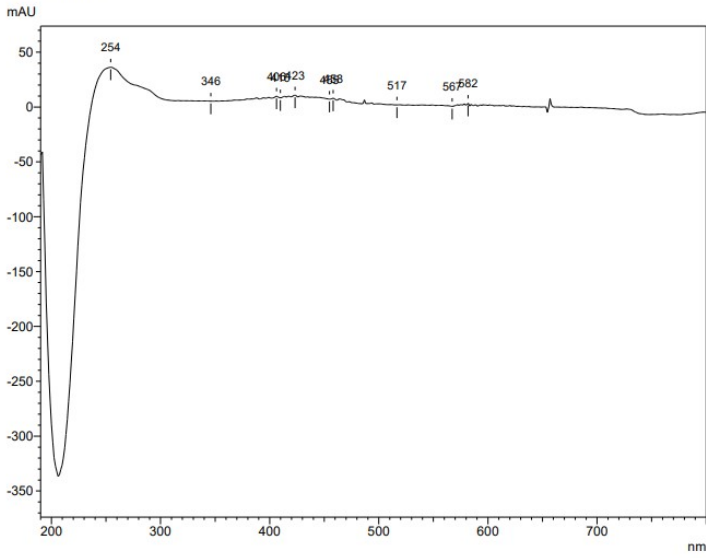

Fig. S7 (e) UV spectra of S18 at  $t_R=37.500$

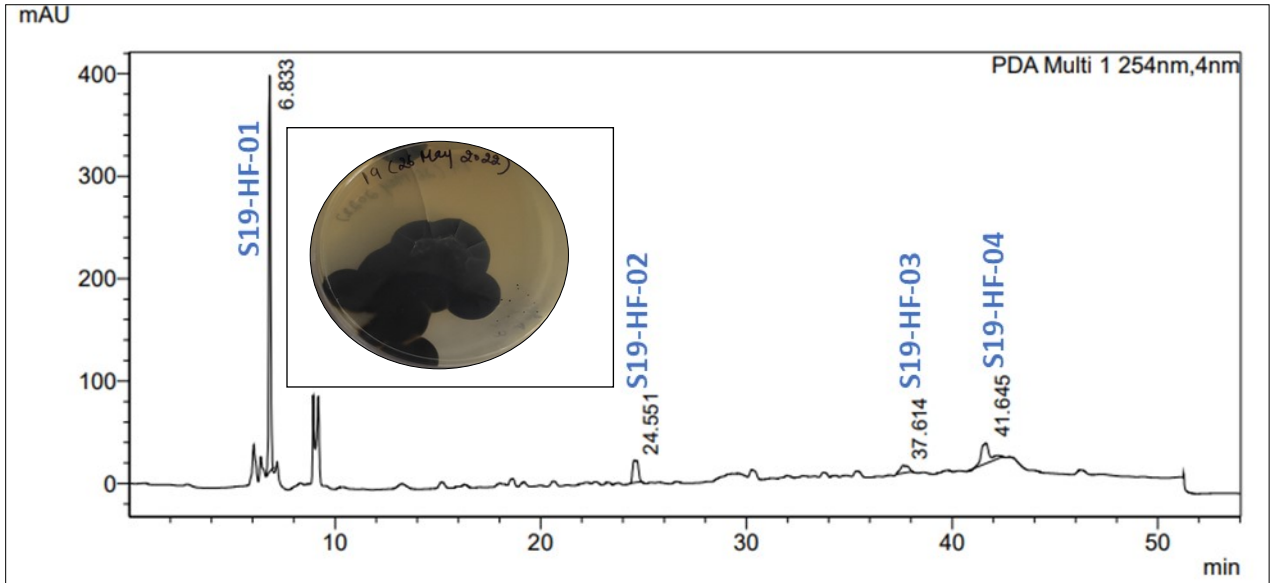

Fig. S8: Chromatographic fingerprinting of epiphytic strain *Fusarium* spp. S19 at 254nm

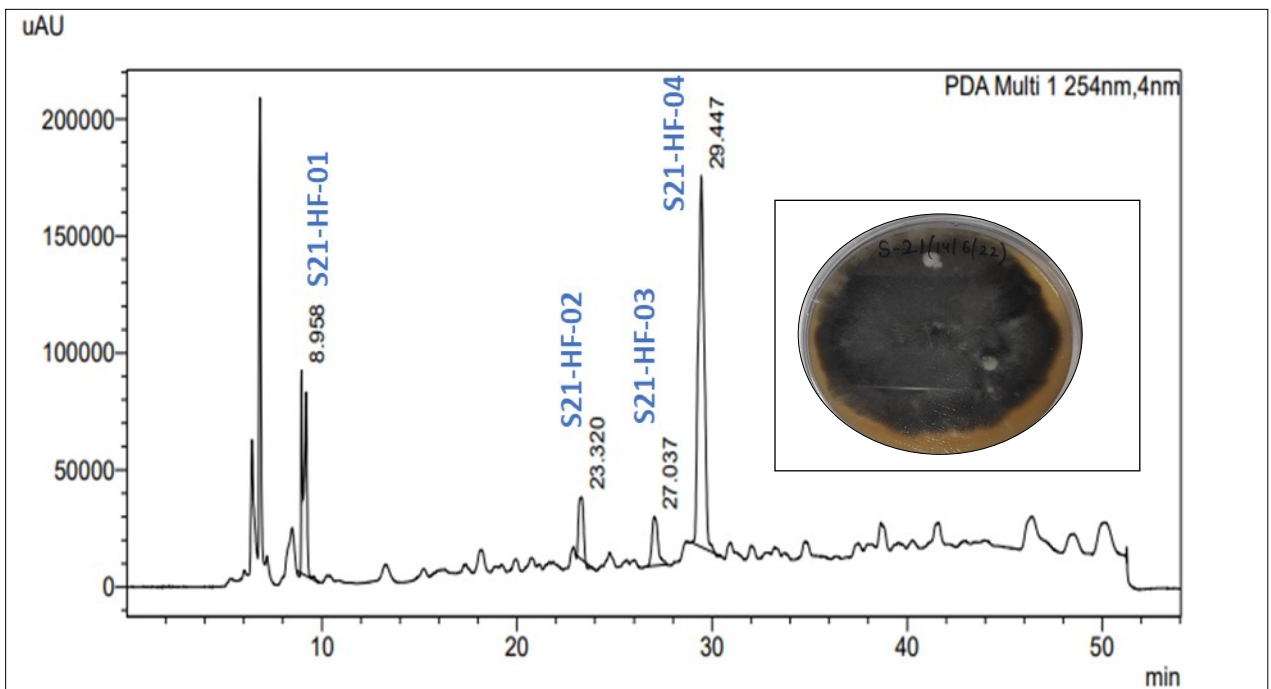

Fig. S9: Chromatographic fingerprinting of epiphytic strain *Aspergillus* spp. S21 at 254nm

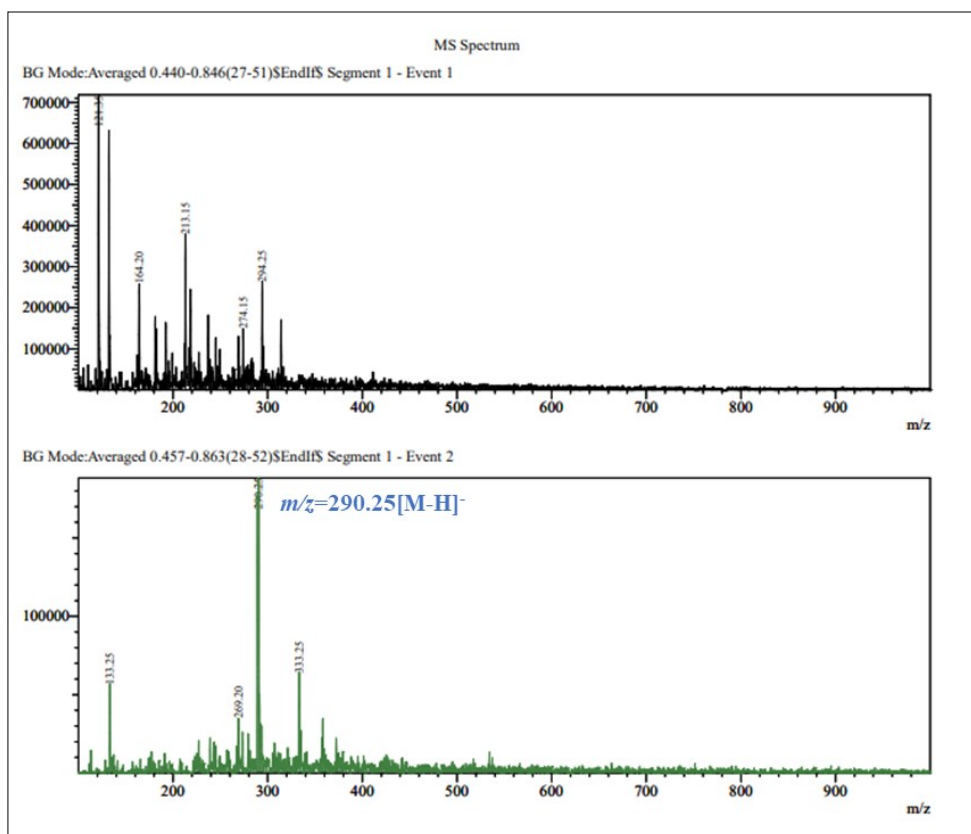

Fig. S10 (a): Observed mass  $m/z$  of S21-HF-02 fraction collected at  $t_R$ 23.320

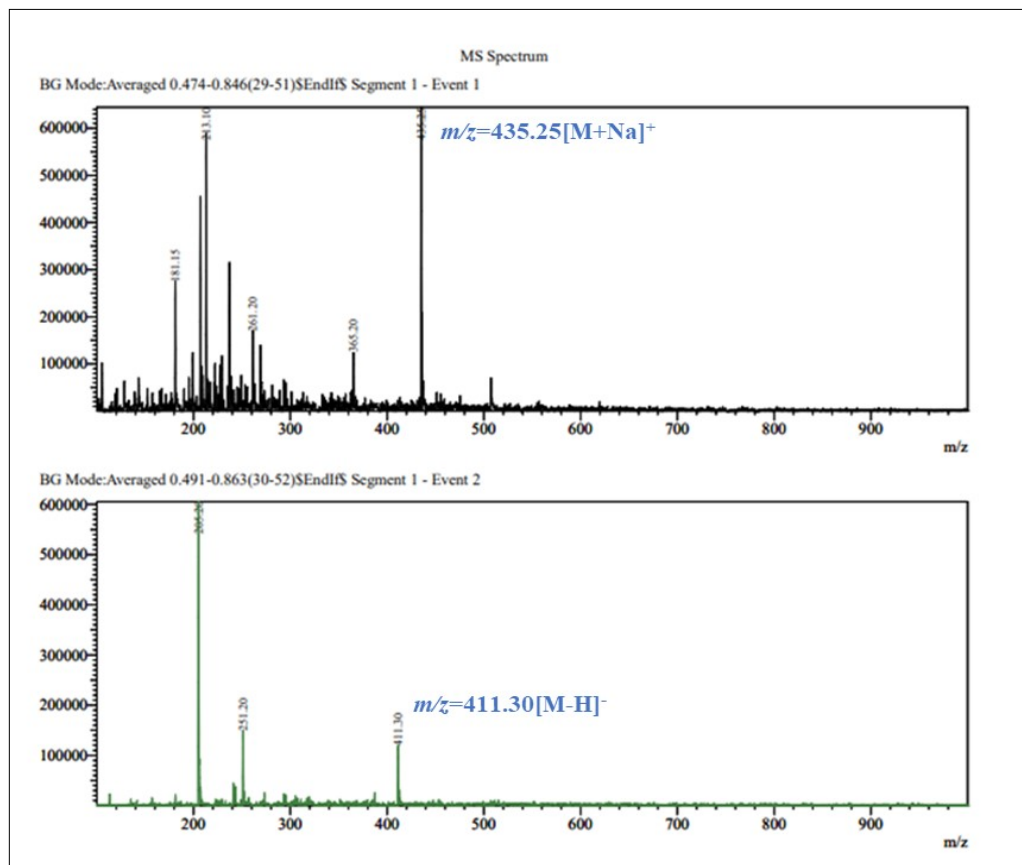

Fig. S10 (b): Observed mass  $m/z$  of S21-HF-03 fraction collected at  $t_R$ 27.037

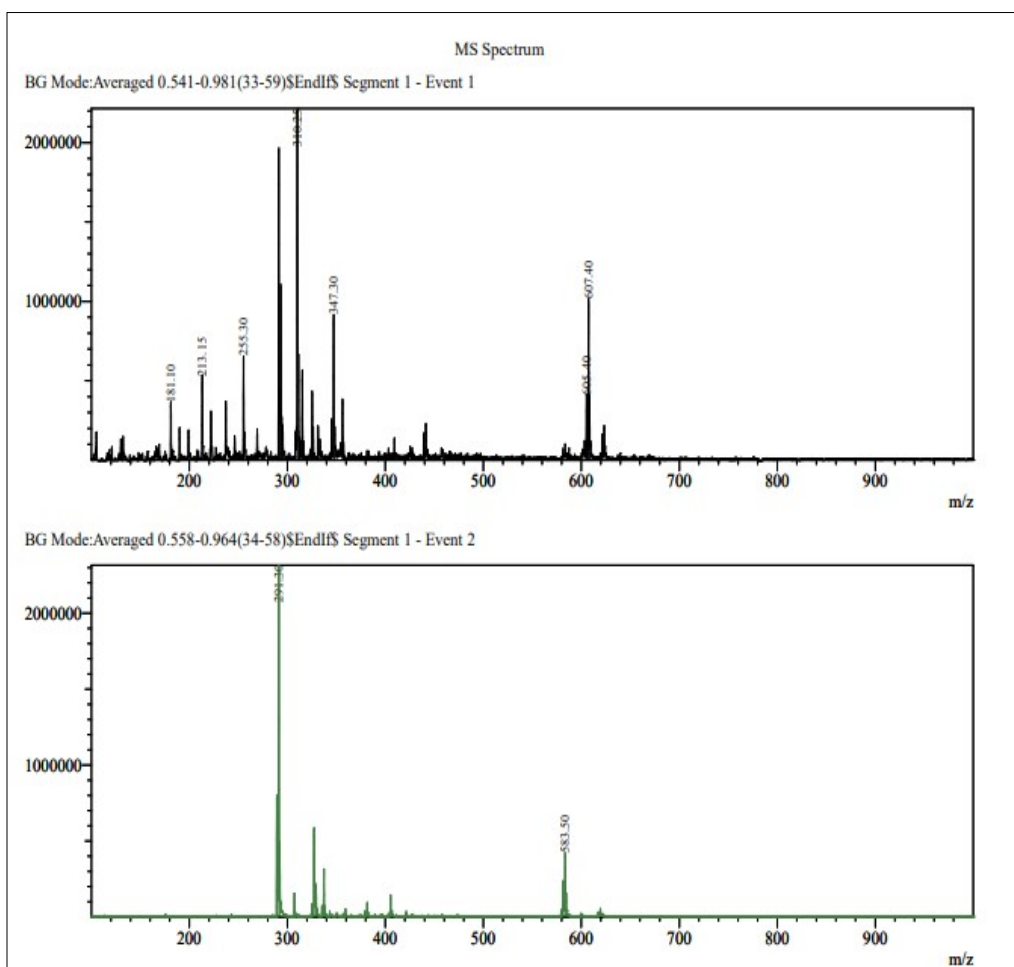

Fig. S10 (c): Observed mass  $m/z$  of S21-HF-04 at fraction collected  $t_R$  29.447

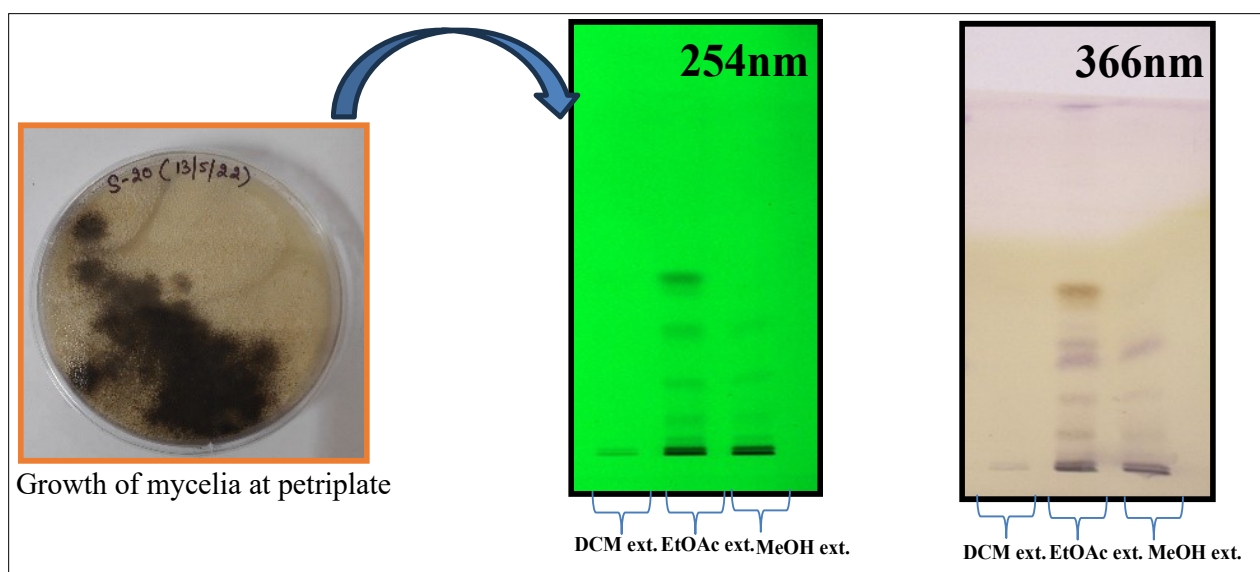

Fig. S11 (a): HPTLC fingerprinting of S20

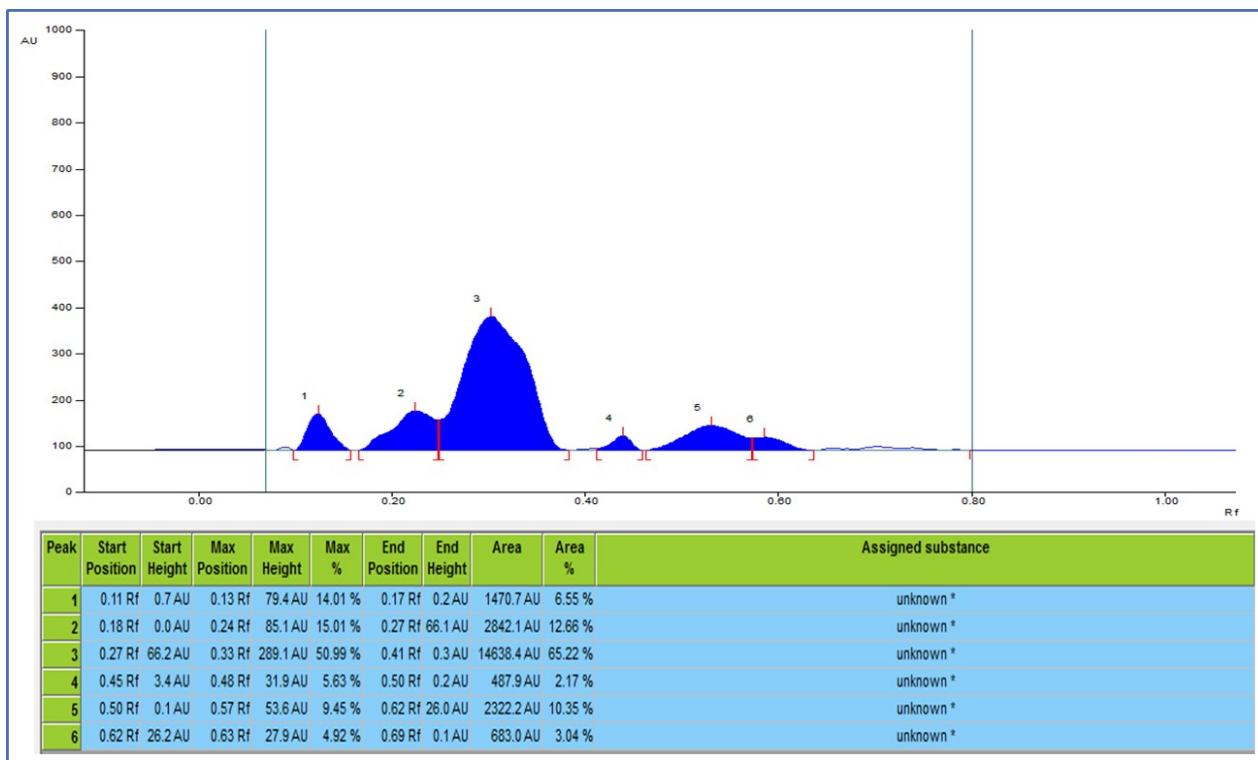

Fig. S11 (b): HPTLC densitogram for ethyl acetate extract of S-20

### Identification of potential metabolite producing strain S-20

Out of 5 epiphytic strains isolated from *Withania somnifera*, strain S-20 were selected and identified by slide culture technique as shown in Fig..1.

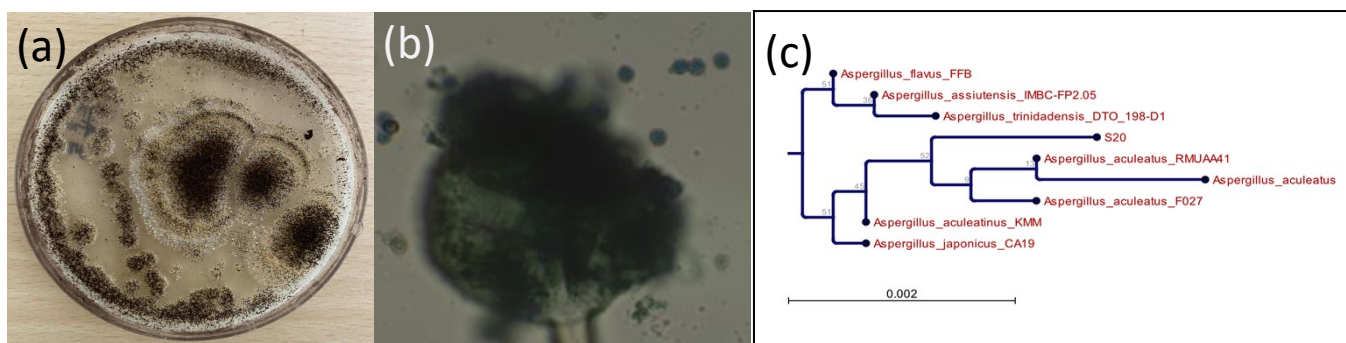

Fig. S11: Morphological and microscopic view of *Aspergillus aculeatus* S20: (a) Growth of S20 on PDA for five days (b) Microscopic view of S20 strain as observed by staining with lacto phenol cotton blue gram staining. The morphology of this fungus was closely related to *Aspergillus aculeatus*. The pure culture was grown in PDA (Potato Dextrose Agar) media. (c) the culture showing similarity with *Aspergillus aculeatus*, strain RMUAA41.

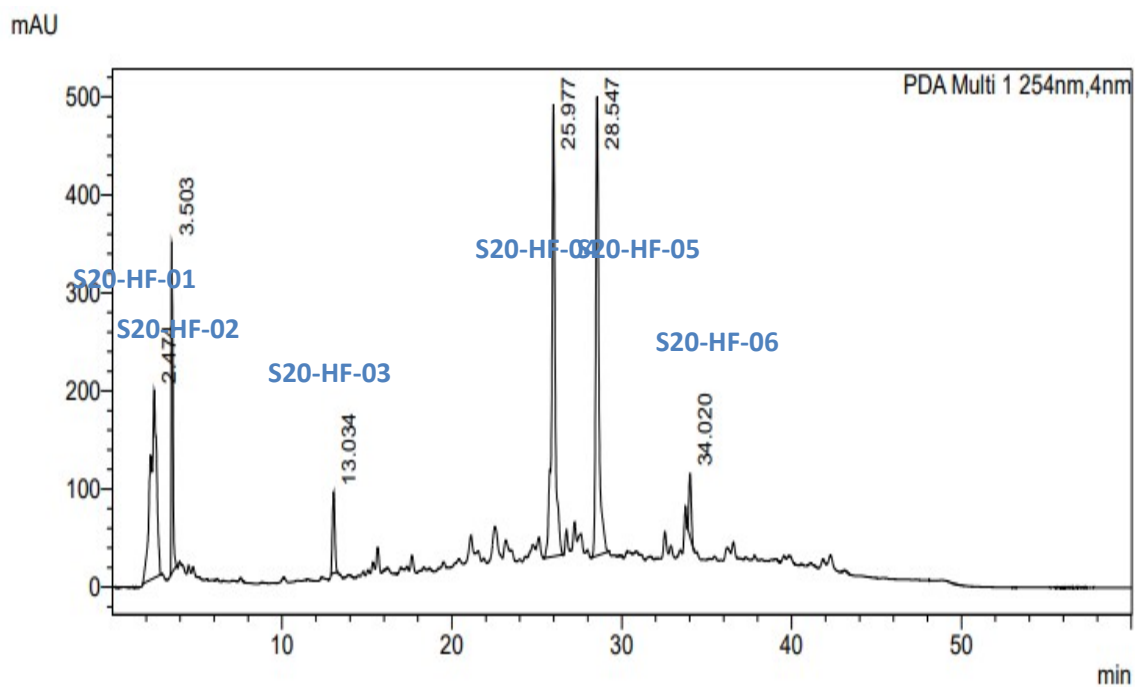

Fig. S13: Chromatographic fingerprinting of S20 at 254nm

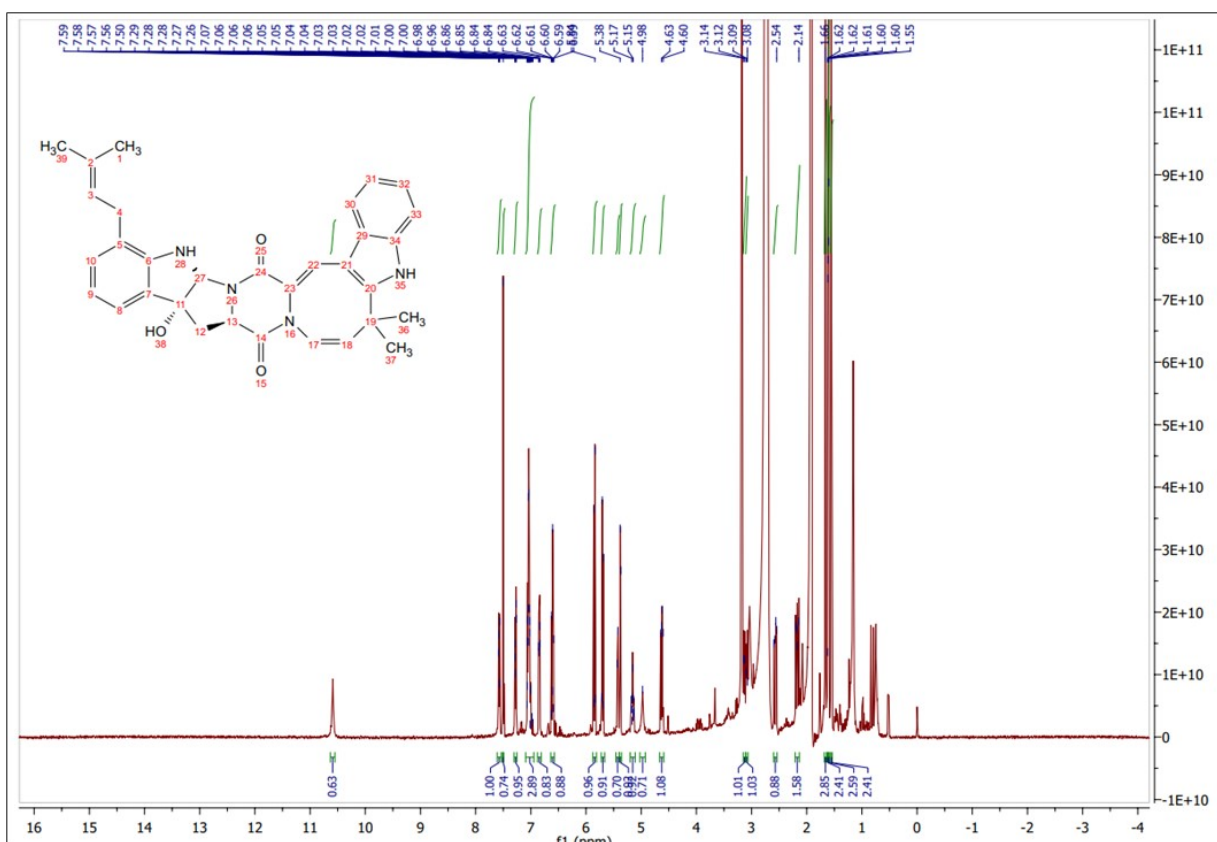

Fig. S14 (a):  $^1\text{H}$  spectrum of S20-HF-04 in  $(\text{CD}_3)_2\text{CO}$  at (400 MHz)

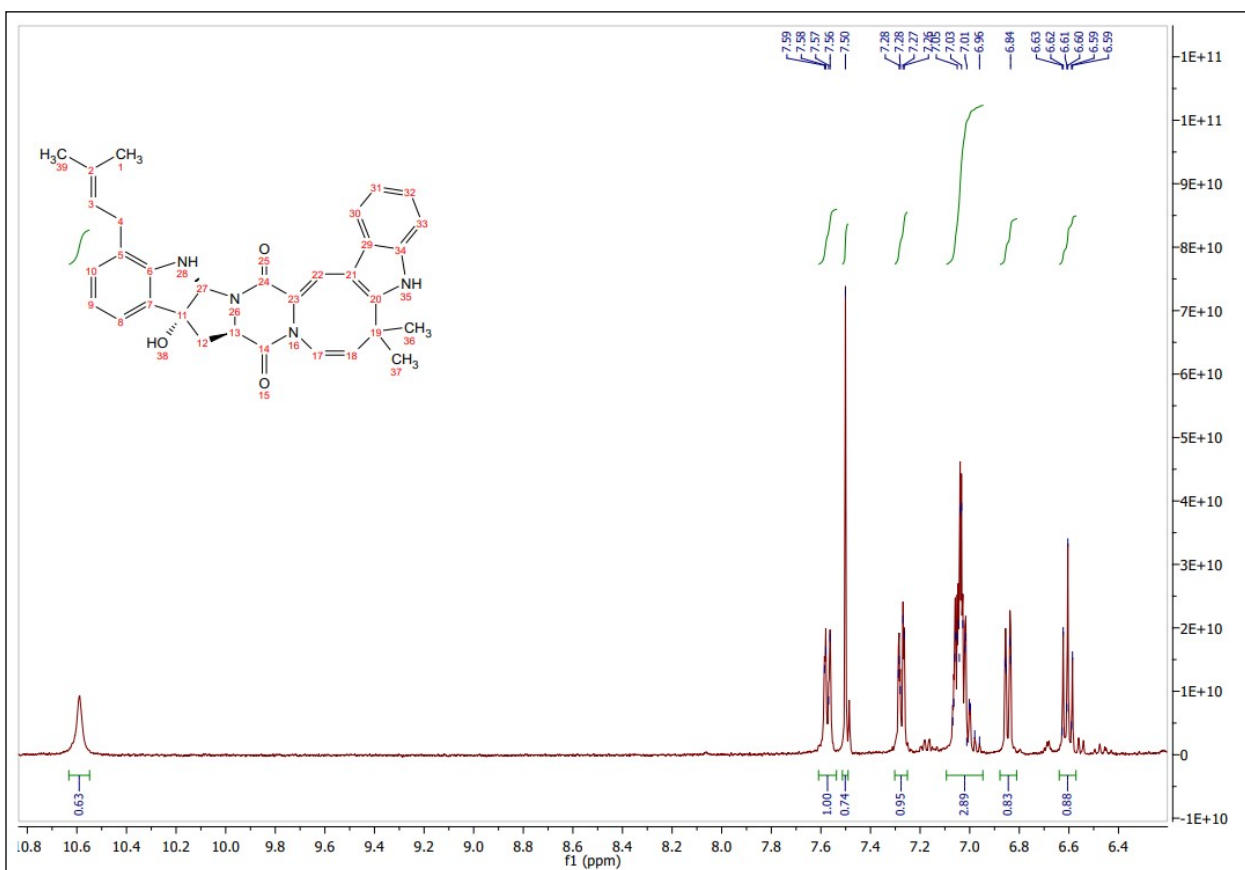

Fig. S14 (b) Expanded  $^1\text{H}$  spectrum of S20-HF-04 in  $(\text{CD}_3)_2\text{CO}$  6.4-10.8ppm

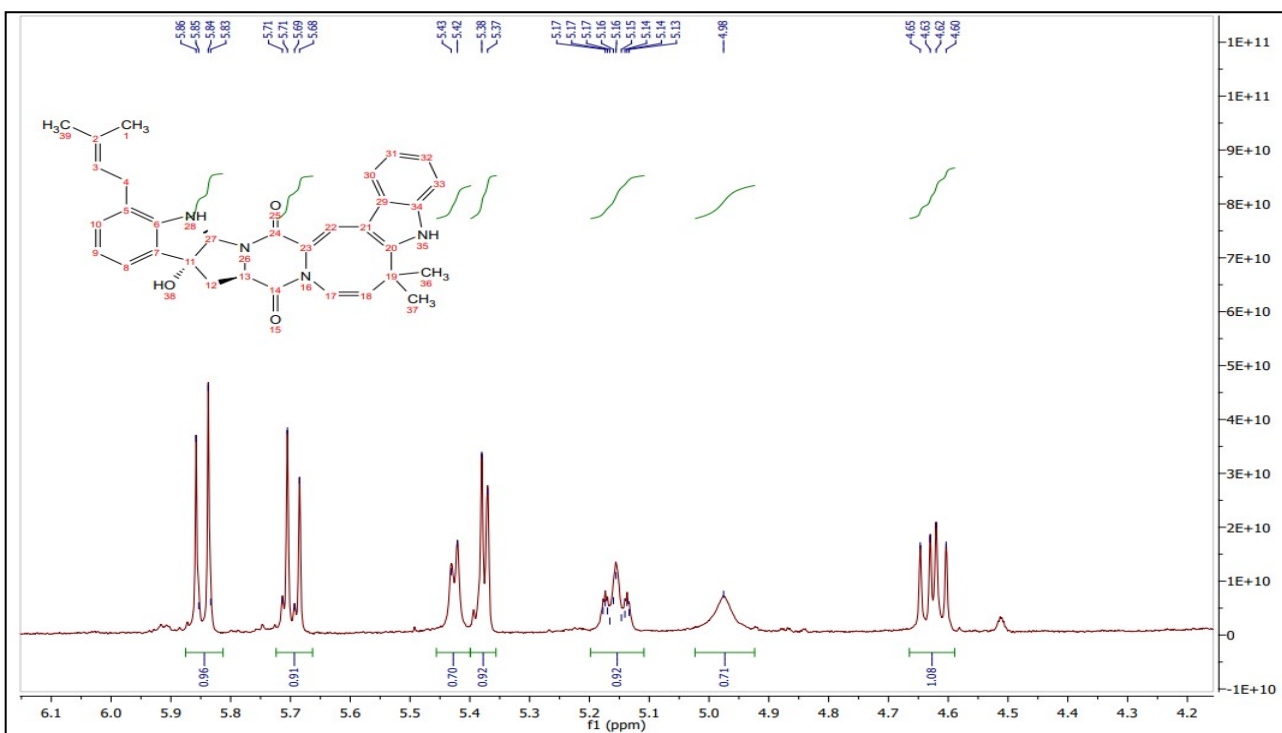

Fig. S14 (c). Expanded  $^1\text{H}$  spectrum of S20-HF-04 in  $(\text{CD}_3)_2\text{CO}$  4.3-6.1 ppm



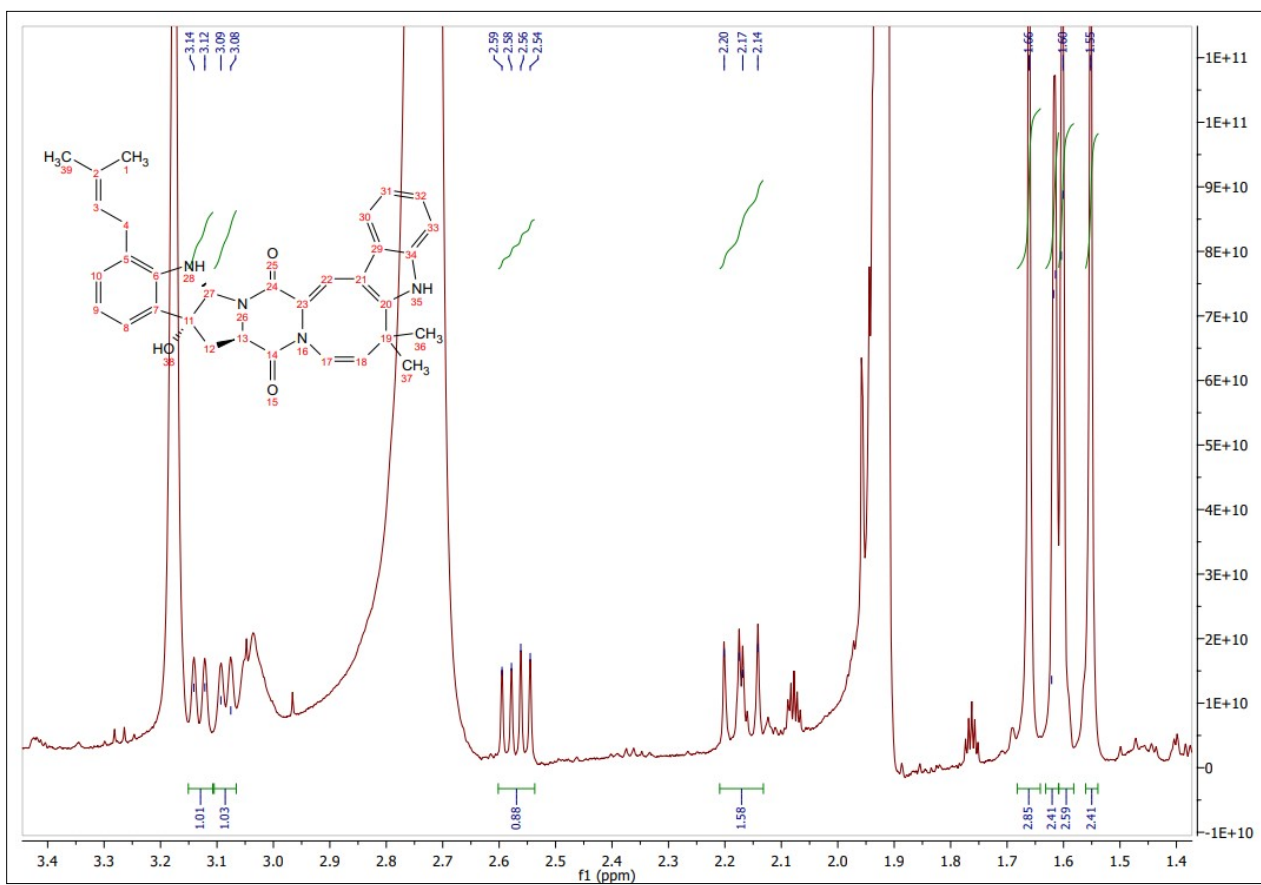

Fig. S14 (d). Expanded <sup>1</sup>H spectrum of S20-HF-04 in (CD<sub>3</sub>)<sub>2</sub>CO 1.4-3.4 ppm

ID# : 1  
 Name : Okaramine H  
 Quantitative Method : External Standard  
 Function :  $f(x)=3294.11 \cdot x-28526.5$   
 Rr1=0.9995570 Rr2=0.9991143 RSS=1.853543e+009  
 MeanRF: 2.686334e+003 RFSD: 4.395864e+002 RFRSD: 16.363805  
 FitType : Linear  
 ZeroThrough : Not Through  
 Weighted Regression : None  
 Detector Name : PDA

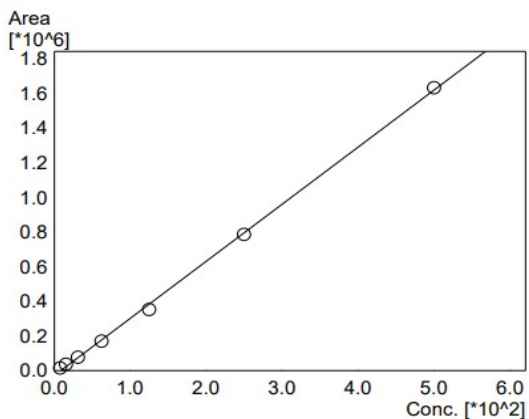

| # | Conc.(Ratio) | MeanArea | Area    |
|---|--------------|----------|---------|
| 1 | 7.81         | 15634    | 15634   |
| 2 | 15.62        | 37339    | 37339   |
| 3 | 31.25        | 77153    | 77153   |
| 4 | 62.5         | 170363   | 170363  |
| 5 | 125          | 351878   | 351878  |
| 6 | 250          | 784928   | 784928  |
| 7 | 500          | 1631367  | 1631367 |

Fig. S15. Calibration curve of isolated fraction (Okaramine H)

ID# : 1  
 Name : 2E,4Z-N-Isobutyl, 2,4 dienamide  
 Quantitative Method : External Standard  
 Function :  $f(x)=4950.59 \cdot x-33367.5$   
 Rr1=0.9999889 Rr2=0.9999779 RSS=3.151426e+008  
 MeanRF: 4.744028e+003 RFSD: 1.922660e+002 RFRSD: 4.052800  
 FitType : Linear  
 ZeroThrough : Not Through  
 Weighted Regression : None  
 Detector Name : PDA

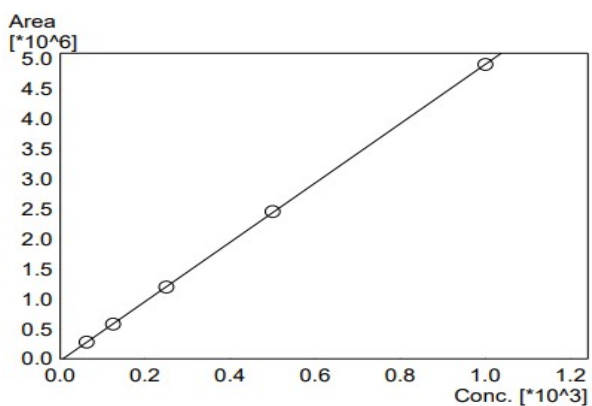

| # | Conc.(Ratio) | MeanArea | Area    |
|---|--------------|----------|---------|
| 1 | 62.5         | 278746   | 278746  |
| 2 | 125          | 581298   | 581298  |
| 3 | 250          | 1196250  | 1196250 |
| 4 | 500          | 2456186  | 2456186 |
| 5 | 1000         | 4912453  | 4912453 |

Fig. S16. Calibration curve of isolated fraction (2E,4Z)-N-Isobutyl-2,4-dienamide
